# Supplementary material for: Expression of Renal Vitamin D and Phosphatonin-Related Genes in a Sheep Model of Osteoporosis
Source: MDPI journal article supplement (doi:10.3390/ani12010067), 2021-12-29
Supplement: s1 [file s1]

Supplementary Table S1. Ovine phosphatonin and vitamin D-related kidney genes - transient receptor potential cation channel subfamily V member 5 (TRPV5), transient receptor potential cation channel subfamily V member 6 (TRPV6), Calbindin D<sub>9k</sub> (calD<sub>9k</sub>), Calbindin D<sub>28k</sub> (calD<sub>28k</sub>), plasma membrane calcium ATPase (PMCA), sodium calcium exchanger 1 (NCX1), cytochrome P450 family 27 subfamily B polypeptide 1 (CYP27B1), cytochrome P450 family 24 subfamily A polypeptide 1 (CYP24A1), vitamin D receptor (VDR), fibroblast growth factor receptor 1 IIIc (FGFR1IIIc),  $\alpha$ -klotho (klotho), sodium-phosphate co-transporter 1 (NPT1), NPT2a, NPT2c, parathyroid hormone 1 receptor (PTH1R), succinate dehydrogenase complex (SDH) and phosphoglycerate kinase 1 (PGK1). Primer sequences from Azarpeykan et al. 2016 and Dittmer et al. 2020<sup>1,2</sup>

| Gene                      | Full gene name                                                   | Primer (5'-3')                                                 | Amplicon length (bp) | Primer concentration nM F:R | PCR Efficiency % | Regression coefficient (R <sup>2</sup> ) |
|---------------------------|------------------------------------------------------------------|----------------------------------------------------------------|----------------------|-----------------------------|------------------|------------------------------------------|
| <b>TRPV5</b>              | Transient receptor potential cation channel subfamily V member 5 | F: CGGGTCAGCAATCATCCTAT<br>R: ATTGTGATGACGTGGAATGG             | 108                  | 250:250                     | 110.6            | 0.96                                     |
| <b>TRPV6</b>              | Transient receptor potential cation channel subfamily V member 6 | F: TGATGCTGGAGAAGAAGCTG<br>R: TGGTTGATGTCCTGTTTCTCTT           | 118                  | 250:250                     | 93.9             | 0.98                                     |
| <b>calD<sub>9k</sub></b>  | Calbindin D9k                                                    | F: TCACTGCTGAACGCCAGGACA<br>R: AGCTCCTCCTGGACAGTTGGT           | 122                  | 250:250                     | 99.3             | 0.99                                     |
| <b>calD<sub>28k</sub></b> | Calbindin D28k                                                   | F: GCTGGAAAAAGCAAACAAGACTGTTGA<br>R: TTCTCCTGCACGGGTAGTAATCTGG | 139                  | 400:400                     | 90.8             | 0.98                                     |
| <b>PMCA</b>               | Plasma membrane calcium ATPase                                   | F: TGCAGCCATAGTATCATTGGGCCT<br>R: TTGCCGCTCCTTCAATCCAACCA      | 128                  | 250:250                     | 94.9             | 0.99                                     |
| <b>NCX1</b>               | Sodium calcium exchanger 1                                       | F: TGGCGAACATCAACCCGTGCT<br>R: TGCAGATTGTAGCGTCGCATCTCG        | 93                   | 300:300                     | 98.4             | 0.99                                     |
| <b>CYP27B1</b>            | Cytochrome P450 family 27 subfamily B polypeptide 1              | F: GCAGAGCTTGAGTTGCACAT<br>R: CTTCTCTCAGGCACCAGGAC             | 119                  | 250:250                     | 102.2            | 0.92                                     |
| <b>CYP24A1</b>            | Cytochrome P450 family 24 subfamily A polypeptide 1              | F: CTGTGATGAGAGAGGCCGATTGA<br>R: AGCTTCCTCCCCTGCCTTCTT         | 128                  | 600:600                     | 103.9            | 0.99                                     |
| <b>VDR</b>                | Vitamin D receptor                                               | F: TCATGCTGCGCTCCAACCACT<br>R: TGGAACCTTGATGAGGGGCTCGAT        | 140                  | 400:400                     | 93.5             | 0.98                                     |
| <b>FGFR1IIIc</b>          | Fibroblast growth factor receptor 1 IIIc                         | F: ACACCACCGACAAAGAGATGG<br>R: TCAGCCATGCAGAGTGATGG            | 120                  | 900:900                     | 99.3             | 0.99                                     |

|                            |                                    |                                                       |     |         |      |      |
|----------------------------|------------------------------------|-------------------------------------------------------|-----|---------|------|------|
| <b>Klotho</b>              | Alpha-klotho                       | F: TGTGGAGAATGGCTGGTTTGT<br>R: TACCCAATGACATCCACCCC   | 129 | 300:300 | 96.0 | 1.00 |
| <b>NPT1<br/>(SLC17A1)</b>  | Sodium-phosphate co-transporter 1  | F: TCCCACTGGCAGCTGAATTT<br>R: CTCAGAGCAGTAAGTCGGCC    | 148 | 300:300 | 98.1 | 1.00 |
| <b>NPT2a<br/>(SLC34A1)</b> | Sodium-phosphate co-transporter 2a | F: CACCATGACCCACTGCCTG<br>R: TCCAGGGAGCAGACGAAGAG     | 149 | 300:300 | 98.8 | 0.99 |
| <b>NPT2c<br/>(SLC34A3)</b> | Sodium-phosphate co-transporter 2c | F: CGACATCCTCAAGGTGCTGA<br>R: AATAAGGCTCCGTTGGTGG     | 109 | 300:300 | 100  | 0.99 |
| <b>PTH1R</b>               | Parathyroid hormone 1 receptor     | F: CAGTACCGGAAGCTGCTCAA<br>R: TTGCCAGAGAGTCCCTGAGA    | 111 | 900:900 | 98.6 | 1.00 |
| <b>SDHA</b>                | Succinate dehydrogenase complex    | F: ACCTGATGCTTTGTGCTCTGC<br>R: CCTGGATGGGCTTGAGTAA    | 126 | 300:300 | 97.1 | 0.99 |
| <b>PGK1</b>                | Phosphoglycerate kinase 1          | F: ACTCCTTGACAGCCAGTTGCT<br>R: AGCACAAGCCTTCTCCACTTCT | 101 | 300:300 | 94.5 | 0.99 |

1. Azarpeykan S, Dittmer KEKE, Marshall JCJC, et al. Evaluation and Comparison of Vitamin D Responsive Gene Expression in Ovine, Canine and Equine Kidney. *PLoS One*. 2016;11:e0162598.
2. Dittmer KE, Heathcott RW, Marshall JC, Azarpeykan S. Expression of phosphatonin-related genes in sheep, dog and horse kidneys using quantitative reverse transcriptase pcr. 2020;10:1806.
